# Supplementary material for: Effectiveness of Indirect and Direct Laryngoscopes in Pediatric Patients: A Systematic Review and Network Meta-Analysis
Source: MDPI journal article supplement (doi:10.3390/children9091280), 2022-08-25
Supplement: s1 [file s1]

## Supplementary Materials

### Search strategy for Pubmed

((("paediatrics"[All Fields] OR "pediatrics"[MeSH Terms] OR "pediatrics"[All Fields] OR "paediatric"[All Fields] OR "pediatric"[All Fields]) AND ("laryngoscope s"[All Fields] OR "laryngoscopes"[MeSH Terms] OR "laryngoscopes"[All Fields] OR "laryngoscope"[All Fields] OR "laryngoscopic"[All Fields] OR "laryngoscopical"[All Fields] OR "laryngoscopically"[All Fields]) AND ("intubate"[All Fields] OR "intubated"[All Fields] OR "intubates"[All Fields] OR "intubating"[All Fields] OR "intubation"[MeSH Terms] OR "intubation"[All Fields] OR "intubations"[All Fields] OR "intubator"[All Fields] OR "intubators"[All Fields])) AND (humans[Filter])

### Search terms for the Cochrane library

#1 tracheal intubation  
#2 intubation  
#3 #1 or #2  
#4 videolaryngoscope  
#5 video laryngoscope  
#6 videolaryngoscopes  
#7 video laryngoscopes  
#8 indirect laryngoscope  
#9 #4 or #5 or #6 or #7 or #8  
#10 paediatrics  
#11 pediatrics  
#12 paediatric  
#13 pediatric  
#14 child  
#15 # 10 or #11 or #12 or #13 or #14  
#16 #3 and #9 and #15

### Search strategy for EMBASE

(tracheal intubation OR intubation)  
AND (videolaryngoscope OR video laryngoscope OR videolaryngoscopes OR video laryngoscopes OR indirectlaryngoscope OR indirect laryngoscope)  
AND (paediatrics OR pediatrics OR paediatric OR pediatric OR child)

Figure S1. Search strategy.

The risks of bias was estimated in the following methodological domains: sequence generation; allocation concealment; blinding of participants; incomplete outcome data; selective outcome reporting; and other potential threats to validity.

Figure S2. The methodological domain of risks of bias.



|                                                                                                                                                                                                                                                                                                                |                                                                                                                                                                                                                                                                                                                |
|----------------------------------------------------------------------------------------------------------------------------------------------------------------------------------------------------------------------------------------------------------------------------------------------------------------|----------------------------------------------------------------------------------------------------------------------------------------------------------------------------------------------------------------------------------------------------------------------------------------------------------------|
| <b>Comparison</b><br><b>Evidence: mixed</b><br>NMA odds ratio: 2.733(0.701,10.663)<br>Direct odds ratio: 4.242(0.764,23.549)<br>Indirect odds ratio: 1.289(0.137,12.118)<br><b>Inconsistency measures</b><br>Ratio of odds ratios: 3.291(0.196,55.263)<br>P value: 0.408<br>Incoherence judgment: No concerns  | <b>Comparison</b><br><b>Evidence: mixed</b><br>NMA odds ratio: 1.030(0.199,5.329)<br>Direct odds ratio: 0.696(0.069,7.052)<br>Indirect odds ratio: 1.533(0.149,15.811)<br><b>Inconsistency measures</b><br>Ratio of odds ratios: 0.454(0.017,12.152)<br>P value: 0.638<br>Incoherence judgment: No concerns    |
| <b>Comparison</b><br><b>Evidence: mixed</b><br>NMA odds ratio: 3.415(0.697,16.720)<br>Direct odds ratio: 1.696(0.192,14.989)<br>Indirect odds ratio: 7.552(0.742,76.869)<br><b>Inconsistency measures</b><br>Ratio of odds ratios: 0.225(0.009,5.417)<br>P value: 0.358<br>Incoherence judgment: No concerns   | <b>Comparison</b><br><b>Evidence: mixed</b><br>NMA odds ratio: 4.776(0.586,38.951)<br>Direct odds ratio: 4.923(0.282,85.841)<br>Indirect odds ratio: 4.611(0.210,101.403)<br><b>Inconsistency measures</b><br>Ratio of odds ratios: 1.068(0.016,71.909)<br>P value: 0.976<br>Incoherence judgment: No concerns |
| <b>Comparison</b><br><b>Evidence: mixed</b><br>NMA odds ratio: 5.968(0.740,48.139)<br>Direct odds ratio: 5.800(0.360,93.513)<br>Indirect odds ratio: 6.192(0.262,146.145)<br><b>Inconsistency measures</b><br>Ratio of odds ratios: 0.937(0.014,63.080)<br>P value: 0.976<br>Incoherence judgment: No concerns | <b>Comparison</b><br><b>Evidence: direct</b><br>Direct odds ratio: 1.432(0.118,17.317)<br>Inconsistency measures: Not applicable<br>Incoherence judgment: No concerns                                                                                                                                          |
| <b>Comparison</b><br><b>Evidence: direct</b><br>Direct odds ratio: 0.030(0.001,0.869)<br>Inconsistency measures: Not applicable<br>Incoherence judgment: No concerns                                                                                                                                           | <b>Comparison</b><br><b>Evidence: mixed</b><br>NMA odds ratio: 0.869(0.149,5.076)<br>Direct odds ratio: 0.324(0.025,4.270)<br>Indirect odds ratio: 2.074(0.184,23.331)<br><b>Inconsistency measures</b><br>Ratio of odds ratios: 0.156(0.005,5.367)<br>P value: 0.304<br>Incoherence judgment: No concerns     |
| <b>Comparison</b><br><b>Evidence: mixed</b><br>NMA odds ratio: 1.086(0.188,6.283)<br>Direct odds ratio: 2.685(0.242,29.830)<br>Indirect odds ratio: 0.389(0.030,5.054)<br><b>Inconsistency measures</b><br>Ratio of odds ratios: 6.902(0.205,232.595)<br>P value: 0.282<br>Incoherence judgment: No concerns   | <b>Comparison</b><br><b>Evidence: mixed</b><br>NMA odds ratio: 4.565(0.661,31.526)<br>Direct odds ratio: 3.193(0.254,40.149)<br>Indirect odds ratio: 7.519(0.378,149.635)<br><b>Inconsistency measures</b><br>Ratio of odds ratios: 0.425(0.008,21.372)<br>P value: 0.668<br>Incoherence judgment: No concerns |
| <b>Comparison</b><br><b>Evidence: mixed</b><br>NMA odds ratio: 0.670(0.213,2.107)<br>Direct odds ratio: 0.605(0.158,2.316)<br>Indirect odds ratio: 0.880(0.097,7.973)<br><b>Inconsistency measures</b><br>Ratio of odds ratios: 0.688(0.052,9.072)<br>P value: 0.776<br>Incoherence judgment: No concerns      | <b>Comparison</b><br><b>Evidence: mixed</b><br>NMA odds ratio: 0.837(0.235,2.985)<br>Direct odds ratio: 0.957(0.185,4.951)<br>Indirect odds ratio: 0.686(0.092,5.098)<br><b>Inconsistency measures</b><br>Ratio of odds ratios: 1.395(0.104,18.664)<br>P value: 0.801<br>Incoherence judgment: No concerns     |

|                                                                                                                                                                                                                                                                                                                  |                                                                                                                                                                                                                                                                                                                |
|------------------------------------------------------------------------------------------------------------------------------------------------------------------------------------------------------------------------------------------------------------------------------------------------------------------|----------------------------------------------------------------------------------------------------------------------------------------------------------------------------------------------------------------------------------------------------------------------------------------------------------------|
| <b>Comparison</b><br><b>Evidence: mixed</b><br>NMA odds ratio: 2.132(0.305,14.910)<br>Direct odds ratio: 1.517(0.184,12.530)<br>Indirect odds ratio: 14.322(0.097,2109.276)<br><b>Inconsistency measures</b><br>Ratio of odds ratios: 0.106(0.000,23.932)<br>P value: 0.417<br>Incoherence judgment: No concerns | <b>Comparison</b><br><b>Evidence: mixed</b><br>NMA odds ratio: 3.518(0.618,20.019)<br>Direct odds ratio: 3.231(0.304,34.326)<br>Indirect odds ratio: 3.891(0.299,50.694)<br><b>Inconsistency measures</b><br>Ratio of odds ratios: 0.830(0.025,27.205)<br>P value: 0.917<br>Incoherence judgment: No concerns  |
| <b>Comparison</b><br><b>Evidence: mixed</b><br>NMA odds ratio: 0.350(0.036,3.414)<br>Direct odds ratio: 1.000(0.014,72.879)<br>Indirect odds ratio: 0.231(0.016,3.407)<br><b>Inconsistency measures</b><br>Ratio of odds ratios: 4.320(0.027,682.116)<br>P value: 0.571<br>Incoherence judgment: No concerns     | <b>Comparison</b><br><b>Evidence: mixed</b><br>NMA odds ratio: 0.437(0.055,3.481)<br>Direct odds ratio: 0.320(0.031,3.318)<br>Indirect odds ratio: 1.381(0.016,122.940)<br><b>Inconsistency measures</b><br>Ratio of odds ratios: 0.231(0.001,36.558)<br>P value: 0.571<br>Incoherence judgment: No concerns   |
| <b>Comparison</b><br><b>Evidence: mixed</b><br>NMA odds ratio: 0.377(0.102,1.397)<br>Direct odds ratio: 0.382(0.078,1.869)<br>Indirect odds ratio: 0.367(0.036,3.714)<br><b>Inconsistency measures</b><br>Ratio of odds ratios: 1.039(0.063,17.193)<br>P value: 0.979<br>Incoherence judgment: No concerns       | <b>Comparison</b><br><b>Evidence: mixed</b><br>NMA odds ratio: 5.252(0.963,28.654)<br>Direct odds ratio: 7.824(0.928,65.957)<br>Indirect odds ratio: 2.637(0.160,43.480)<br><b>Inconsistency measures</b><br>Ratio of odds ratios: 2.967(0.088,100.354)<br>P value: 0.545<br>Incoherence judgment: No concerns |
| <b>Comparison</b><br><b>Evidence: mixed</b><br>NMA odds ratio: 3.314(0.681,16.137)<br>Direct odds ratio: 2.435(0.257,23.081)<br>Indirect odds ratio: 4.486(0.484,41.621)<br><b>Inconsistency measures</b><br>Ratio of odds ratios: 0.543(0.023,12.865)<br>P value: 0.705<br>Incoherence judgment: No concerns    | <b>Comparison</b><br><b>Evidence: mixed</b><br>NMA odds ratio: 2.548(0.336,19.294)<br>Direct odds ratio: 4.229(0.397,45.038)<br>Indirect odds ratio: 0.636(0.013,31.874)<br><b>Inconsistency measures</b><br>Ratio of odds ratios: 6.649(0.069,644.258)<br>P value: 0.417<br>Incoherence judgment: No concerns |
| <b>Comparison</b><br><b>Evidence: direct</b><br>Direct odds ratio: 0.643(0.052,7.933)<br>Inconsistency measures: Not applicable<br>Incoherence judgment: No concerns                                                                                                                                             | <b>Comparison</b><br><b>Evidence: indirect</b><br>Indirect odds ratio: 1.748(0.159,19.269)<br>Inconsistency measures: Not applicable<br>Incoherence judgment: No concerns                                                                                                                                      |
| <b>Comparison</b><br><b>Evidence: indirect</b><br>Indirect odds ratio: 2.849(0.142,57.111)<br>Inconsistency measures: Not applicable<br>Incoherence judgment: No concerns                                                                                                                                        | <b>Comparison</b><br><b>Evidence: indirect</b><br>Indirect odds ratio: 92.573(2.415,3548.570)<br>Inconsistency measures: Not applicable<br>Incoherence judgment: No concerns                                                                                                                                   |
| <b>Comparison</b><br><b>Evidence: indirect</b><br>Indirect odds ratio: 3.144(0.379,26.073)<br>Inconsistency measures: Not applicable<br>Incoherence judgment: No concerns                                                                                                                                        | <b>Comparison</b><br><b>Evidence: indirect</b><br>Indirect odds ratio: 4.080(0.772,21.574)<br>Inconsistency measures: Not applicable<br>Incoherence judgment: No concerns                                                                                                                                      |



|                                                                                                                                                                                          |                                                                                                                                                                                            |
|------------------------------------------------------------------------------------------------------------------------------------------------------------------------------------------|--------------------------------------------------------------------------------------------------------------------------------------------------------------------------------------------|
| <b>Comparison</b><br><b>Evidence:</b> indirect<br>Indirect odds ratio: 7.813(0.635,96.130)<br>Inconsistency measures: Not applicable<br>Incoherence judgment: <span>No concerns</span>   | <b>Comparison</b><br><b>Evidence:</b> indirect<br>Indirect odds ratio: 8.700(0.782,96.805)<br>Inconsistency measures: Not applicable<br>Incoherence judgment: <span>No concerns</span>     |
| <b>Comparison</b><br><b>Evidence:</b> indirect<br>Indirect odds ratio: 2.195(0.112,42.910)<br>Inconsistency measures: Not applicable<br>Incoherence judgment: <span>No concerns</span>   | <b>Comparison</b><br><b>Evidence:</b> indirect<br>Indirect odds ratio: 14.355(1.743,118.250)<br>Inconsistency measures: Not applicable<br>Incoherence judgment: <span>No concerns</span>   |
| <b>Comparison</b><br><b>Evidence:</b> indirect<br>Indirect odds ratio: 4.980(0.174,142.451)<br>Inconsistency measures: Not applicable<br>Incoherence judgment: <span>No concerns</span>  | <b>Comparison</b><br><b>Evidence:</b> indirect<br>Indirect odds ratio: 161.790(3.021,8664.591)<br>Inconsistency measures: Not applicable<br>Incoherence judgment: <span>No concerns</span> |
| <b>Comparison</b><br><b>Evidence:</b> indirect<br>Indirect odds ratio: 5.495(0.416,72.574)<br>Inconsistency measures: Not applicable<br>Incoherence judgment: <span>No concerns</span>   | <b>Comparison</b><br><b>Evidence:</b> indirect<br>Indirect odds ratio: 7.131(0.757,67.209)<br>Inconsistency measures: Not applicable<br>Incoherence judgment: <span>No concerns</span>     |
| <b>Comparison</b><br><b>Evidence:</b> indirect<br>Indirect odds ratio: 13.655(0.766,243.447)<br>Inconsistency measures: Not applicable<br>Incoherence judgment: <span>No concerns</span> | <b>Comparison</b><br><b>Evidence:</b> indirect<br>Indirect odds ratio: 1.801(0.166,19.537)<br>Inconsistency measures: Not applicable<br>Incoherence judgment: <span>No concerns</span>     |
| <b>Comparison</b><br><b>Evidence:</b> indirect<br>Indirect odds ratio: 0.770(0.018,33.119)<br>Inconsistency measures: Not applicable<br>Incoherence judgment: <span>No concerns</span>   | <b>Comparison</b><br><b>Evidence:</b> indirect<br>Indirect odds ratio: 5.037(0.241,105.225)<br>Inconsistency measures: Not applicable<br>Incoherence judgment: <span>No concerns</span>    |
| <b>Comparison</b><br><b>Evidence:</b> indirect<br>Indirect odds ratio: 0.034(0.001,1.542)<br>Inconsistency measures: Not applicable<br>Incoherence judgment: <span>No concerns</span>    | <b>Comparison</b><br><b>Evidence:</b> indirect<br>Indirect odds ratio: 0.044(0.001,1.568)<br>Inconsistency measures: Not applicable<br>Incoherence judgment: <span>No concerns</span>      |
| <b>Comparison</b><br><b>Evidence:</b> indirect<br>Indirect odds ratio: 0.084(0.001,4.983)<br>Inconsistency measures: Not applicable<br>Incoherence judgment: <span>No concerns</span>    | <b>Comparison</b><br><b>Evidence:</b> indirect<br>Indirect odds ratio: 0.011(0.000,0.419)<br>Inconsistency measures: Not applicable<br>Incoherence judgment: <span>No concerns</span>      |
| <b>Comparison</b><br><b>Evidence:</b> indirect<br>Indirect odds ratio: 0.037(0.001,1.372)<br>Inconsistency measures: Not applicable<br>Incoherence judgment: <span>No concerns</span>    | <b>Comparison</b><br><b>Evidence:</b> indirect<br>Indirect odds ratio: 0.094(0.002,5.142)<br>Inconsistency measures: Not applicable<br>Incoherence judgment: <span>No concerns</span>      |
| <b>Comparison</b><br><b>Evidence:</b> indirect<br>Indirect odds ratio: 0.024(0.000,1.939)<br>Inconsistency measures: Not applicable<br>Incoherence judgment: <span>No concerns</span>    | <b>Comparison</b><br><b>Evidence:</b> indirect<br>Indirect odds ratio: 0.155(0.004,6.824)<br>Inconsistency measures: Not applicable<br>Incoherence judgment: <span>No concerns</span>      |

|                                                                                                                                                                                          |                                                                                                                                                                                           |
|------------------------------------------------------------------------------------------------------------------------------------------------------------------------------------------|-------------------------------------------------------------------------------------------------------------------------------------------------------------------------------------------|
| <b>Comparison</b><br><b>Evidence:</b> indirect<br>Indirect odds ratio: 15.205(0.916,252.447)<br>Inconsistency measures: Not applicable<br>Incoherence judgment: <span>No concerns</span> | <b>Comparison</b><br><b>Evidence:</b> indirect<br>Indirect odds ratio: 3.837(0.146,100.635)<br>Inconsistency measures: Not applicable<br>Incoherence judgment: <span>No concerns</span>   |
| <b>Comparison</b><br><b>Evidence:</b> indirect<br>Indirect odds ratio: 25.088(1.854,339.441)<br>Inconsistency measures: Not applicable<br>Incoherence judgment: <span>No concerns</span> | <b>Comparison</b><br><b>Evidence:</b> indirect<br>Indirect odds ratio: 32.486(0.417,2530.570)<br>Inconsistency measures: Not applicable<br>Incoherence judgment: <span>No concerns</span> |
| <b>Comparison</b><br><b>Evidence:</b> indirect<br>Indirect odds ratio: 1.103(0.049,24.896)<br>Inconsistency measures: Not applicable<br>Incoherence judgment: <span>No concerns</span>   | <b>Comparison</b><br><b>Evidence:</b> indirect<br>Indirect odds ratio: 2.742(0.090,83.747)<br>Inconsistency measures: Not applicable<br>Incoherence judgment: <span>No concerns</span>    |
| <b>Comparison</b><br><b>Evidence:</b> indirect<br>Indirect odds ratio: 0.959(0.062,14.908)<br>Inconsistency measures: Not applicable<br>Incoherence judgment: <span>No concerns</span>   | <b>Comparison</b><br><b>Evidence:</b> indirect<br>Indirect odds ratio: 0.362(0.018,7.139)<br>Inconsistency measures: Not applicable<br>Incoherence judgment: <span>No concerns</span>     |
| <b>Comparison</b><br><b>Evidence:</b> indirect<br>Indirect odds ratio: 1.198(0.073,19.674)<br>Inconsistency measures: Not applicable<br>Incoherence judgment: <span>No concerns</span>   | <b>Comparison</b><br><b>Evidence:</b> indirect<br>Indirect odds ratio: 3.053(0.129,72.082)<br>Inconsistency measures: Not applicable<br>Incoherence judgment: <span>No concerns</span>    |
| <b>Comparison</b><br><b>Evidence:</b> indirect<br>Indirect odds ratio: 1.298(0.200,8.421)<br>Inconsistency measures: Not applicable<br>Incoherence judgment: <span>No concerns</span>    | <b>Comparison</b><br><b>Evidence:</b> indirect<br>Indirect odds ratio: 2.485(0.176,35.146)<br>Inconsistency measures: Not applicable<br>Incoherence judgment: <span>No concerns</span>    |
| <b>Comparison</b><br><b>Evidence:</b> indirect<br>Indirect odds ratio: 0.328(0.040,2.668)<br>Inconsistency measures: Not applicable<br>Incoherence judgment: <span>No concerns</span>    | <b>Comparison</b><br><b>Evidence:</b> indirect<br>Indirect odds ratio: 2.767(0.218,35.156)<br>Inconsistency measures: Not applicable<br>Incoherence judgment: <span>No concerns</span>    |
| <b>Comparison</b><br><b>Evidence:</b> indirect<br>Indirect odds ratio: 0.698(0.033,14.968)<br>Inconsistency measures: Not applicable<br>Incoherence judgment: <span>No concerns</span>   | <b>Comparison</b><br><b>Evidence:</b> indirect<br>Indirect odds ratio: 1.915(0.184,19.886)<br>Inconsistency measures: Not applicable<br>Incoherence judgment: <span>No concerns</span>    |
| <b>Comparison</b><br><b>Evidence:</b> indirect<br>Indirect odds ratio: 0.253(0.049,1.300)<br>Inconsistency measures: Not applicable<br>Incoherence judgment: <span>No concerns</span>    | <b>Comparison</b><br><b>Evidence:</b> indirect<br>Indirect odds ratio: 0.538(0.032,8.993)<br>Inconsistency measures: Not applicable<br>Incoherence judgment: <span>No concerns</span>     |
| <b>Comparison</b><br><b>Evidence:</b> indirect<br>Indirect odds ratio: 0.132(0.011,1.608)<br>Inconsistency measures: Not applicable<br>Incoherence judgment: <span>No concerns</span>    | <b>Comparison</b><br><b>Evidence:</b> indirect<br>Indirect odds ratio: 1.113(0.064,19.304)<br>Inconsistency measures: Not applicable<br>Incoherence judgment: <span>No concerns</span>    |

|                                                                                                                                                                           |                                                                                                                                                                             |
|---------------------------------------------------------------------------------------------------------------------------------------------------------------------------|-----------------------------------------------------------------------------------------------------------------------------------------------------------------------------|
| <b>Comparison</b><br><b>Evidence: indirect</b><br>Indirect odds ratio: 0.281(0.011,7.310)<br>Inconsistency measures: Not applicable<br>Incoherence judgment: No concerns  | <b>Comparison</b><br><b>Evidence: indirect</b><br>Indirect odds ratio: 1.837(0.123,27.509)<br>Inconsistency measures: Not applicable<br>Incoherence judgment: No concerns   |
| <b>Comparison</b><br><b>Evidence: indirect</b><br>Indirect odds ratio: 1.249(0.348,4.488)<br>Inconsistency measures: Not applicable<br>Incoherence judgment: No concerns  | <b>Comparison</b><br><b>Evidence: indirect</b><br>Indirect odds ratio: 3.183(0.375,27.026)<br>Inconsistency measures: Not applicable<br>Incoherence judgment: No concerns   |
| <b>Comparison</b><br><b>Evidence: indirect</b><br>Indirect odds ratio: 0.803(0.048,13.468)<br>Inconsistency measures: Not applicable<br>Incoherence judgment: No concerns | <b>Comparison</b><br><b>Evidence: indirect</b><br>Indirect odds ratio: 8.444(0.769,92.786)<br>Inconsistency measures: Not applicable<br>Incoherence judgment: No concerns   |
| <b>Comparison</b><br><b>Evidence: indirect</b><br>Indirect odds ratio: 2.131(0.109,41.525)<br>Inconsistency measures: Not applicable<br>Incoherence judgment: No concerns | <b>Comparison</b><br><b>Evidence: indirect</b><br>Indirect odds ratio: 13.934(1.733,112.000)<br>Inconsistency measures: Not applicable<br>Incoherence judgment: No concerns |
| <b>Comparison</b><br><b>Evidence: indirect</b><br>Indirect odds ratio: 4.204(0.639,27.641)<br>Inconsistency measures: Not applicable<br>Incoherence judgment: No concerns | <b>Comparison</b><br><b>Evidence: indirect</b><br>Indirect odds ratio: 0.252(0.010,6.359)<br>Inconsistency measures: Not applicable<br>Incoherence judgment: No concerns    |
| <b>Comparison</b><br><b>Evidence: indirect</b><br>Indirect odds ratio: 1.650(0.132,20.569)<br>Inconsistency measures: Not applicable<br>Incoherence judgment: No concerns | <b>Comparison</b><br><b>Evidence: indirect</b><br>Indirect odds ratio: 6.539(0.283,151.109)<br>Inconsistency measures: Not applicable<br>Incoherence judgment: No concerns  |

Figure S5. Results of inconsistency of the primary outcome.

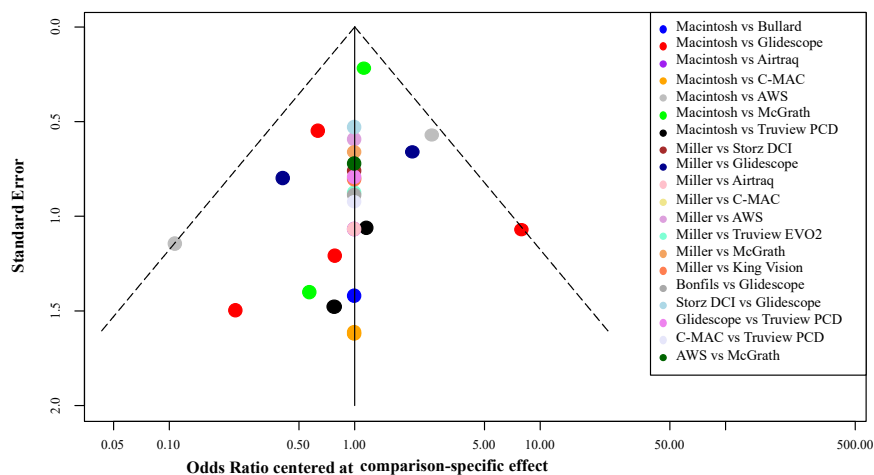

(A)

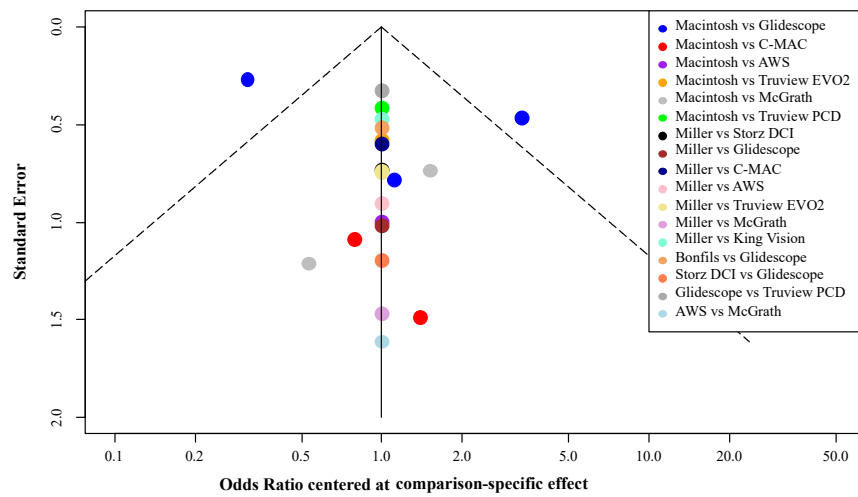

(B)

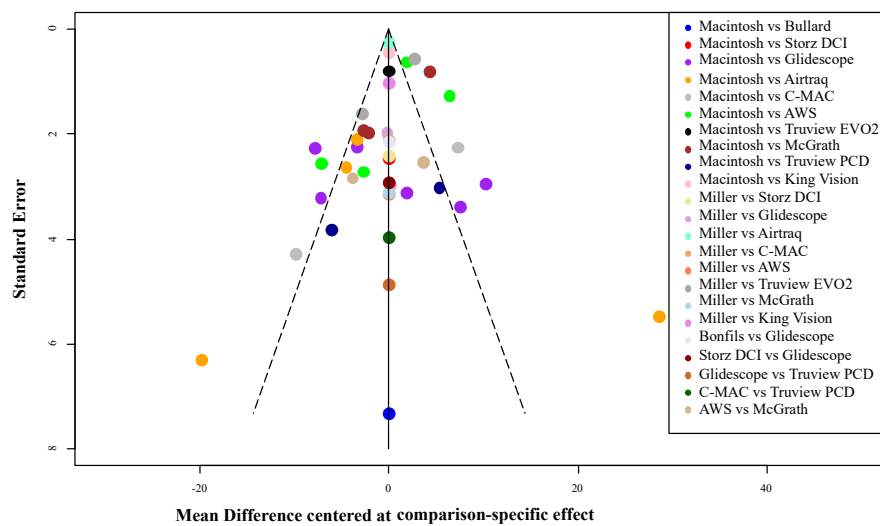

(C)

Figure S6. Results of funnel plot of the primary (A) and secondary outcome (B, C).

|                   |                     |                    |                    |                    |                    |                     |                    |                    |                    |                    |
|-------------------|---------------------|--------------------|--------------------|--------------------|--------------------|---------------------|--------------------|--------------------|--------------------|--------------------|
| AWS               |                     |                    |                    |                    | 0.03 (0.00; 0.59)  | 3.10 (0.07; 145.21) | 0.32 (0.02; 5.42)  |                    |                    |                    |
| 0.15 (0.00; 4.42) | Bonfils             |                    | 1.25 (0.11; 13.93) |                    |                    |                     |                    |                    |                    |                    |
| 0.51 (0.04; 7.09) | 3.48 (0.14; 89.62)  | C-MAC              |                    |                    | 0.20 (0.02; 2.07)  |                     | 0.28 (0.02; 3.39)  |                    |                    |                    |
| 0.18 (0.02; 2.02) | 1.25 (0.11; 13.93)  | 0.36 (0.04; 3.14)  | Glidescope         |                    | 1.11 (0.27; 4.48)  |                     | 0.10 (0.01; 1.94)  | 0.50 (0.02; 12.42) |                    | 4.86 (0.50; 47.66) |
| 0.22 (0.01; 5.57) | 1.49 (0.03; 70.10)  | 0.43 (0.02; 9.04)  | 1.20 (0.06; 24.04) | King Vision        |                    |                     | 0.46 (0.04; 4.99)  |                    |                    |                    |
| 0.14 (0.02; 1.16) | 0.95 (0.06; 14.66)  | 0.27 (0.04; 1.76)  | 0.76 (0.21; 2.78)  | 0.64 (0.04; 11.29) | Macintosh          | 3.64 (0.47; 27.90)  |                    |                    | 4.00 (0.34; 47.27) | 1.38 (0.13; 14.24) |
| 0.67 (0.05; 8.54) | 4.59 (0.18; 117.88) | 1.32 (0.11; 15.94) | 3.68 (0.42; 32.27) | 3.08 (0.12; 77.98) | 4.84 (0.80; 29.18) | McGrath             | 0.10 (0.00; 3.88)  |                    |                    |                    |
| 0.10 (0.01; 0.91) | 0.69 (0.03; 14.20)  | 0.20 (0.03; 1.33)  | 0.55 (0.09; 3.43)  | 0.46 (0.04; 4.99)  | 0.73 (0.14; 3.65)  | 0.15 (0.02; 1.33)   | Miller             | 5.00 (0.36; 68.66) | 4.00 (0.62; 25.72) |                    |
| 0.30 (0.01; 7.63) | 2.05 (0.05; 80.78)  | 0.59 (0.03; 12.45) | 1.64 (0.10; 26.25) | 1.38 (0.04; 44.11) | 2.16 (0.14; 34.54) | 0.45 (0.02; 10.73)  | 2.98 (0.24; 37.12) | Storz DCI          |                    |                    |
| 0.45 (0.04; 5.59) | 3.09 (0.13; 74.96)  | 0.89 (0.09; 8.66)  | 2.48 (0.31; 19.93) | 2.07 (0.12; 36.43) | 3.26 (0.53; 19.90) | 0.67 (0.06; 7.52)   | 4.49 (0.91; 22.19) | 1.51 (0.08; 27.57) | Truview EVO2       |                    |
| 0.43 (0.02; 8.34) | 2.92 (0.12; 71.88)  | 0.84 (0.05; 13.63) | 2.34 (0.28; 19.27) | 1.96 (0.06; 65.35) | 3.08 (0.37; 25.86) | 0.64 (0.04; 10.11)  | 4.24 (0.32; 55.81) | 1.42 (0.05; 41.20) | 0.94 (0.06; 14.55) | Truview PCD        |

Figure S7. League table of the secondary outcome (glottic visualization).

|                                                                                                                                                                                                                                                                                                                       |                                                                                                                                                                                                                                                                                                                |
|-----------------------------------------------------------------------------------------------------------------------------------------------------------------------------------------------------------------------------------------------------------------------------------------------------------------------|----------------------------------------------------------------------------------------------------------------------------------------------------------------------------------------------------------------------------------------------------------------------------------------------------------------|
| <b>Comparison</b><br><b>Evidence: mixed</b><br>NMA odds ratio: 9.409(0.545,162.471)<br>Direct odds ratio: 59.555(1.139,3112.869)<br>Indirect odds ratio: 1.290(0.021,78.281)<br><b>Inconsistency measures</b><br>Ratio of odds ratios: 46.150(0.154,13813.477)<br>P value: 0.188<br>Incoherence judgment: No concerns | <b>Comparison</b><br><b>Evidence: mixed</b><br>NMA odds ratio: 1.619(0.059,44.212)<br>Direct odds ratio: 0.312(0.003,34.080)<br>Indirect odds ratio: 8.214(0.078,868.094)<br><b>Inconsistency measures</b><br>Ratio of odds ratios: 0.038(0.000,28.329)<br>P value: 0.333<br>Incoherence judgment: No concerns |
| <b>Comparison</b><br><b>Evidence: mixed</b><br>NMA odds ratio: 15.102(0.743,306.832)<br>Direct odds ratio: 3.471(0.070,171.743)<br>Indirect odds ratio: 131.894(1.156,15043.481)<br><b>Inconsistency measures</b><br>Ratio of odds ratios: 0.026(0.000,12.170)<br>P value: 0.245<br>Incoherence judgment: No concerns | <b>Comparison</b><br><b>Evidence: direct</b><br>Direct odds ratio: 0.774(0.021,28.129)<br>Inconsistency measures: Not applicable<br>Incoherence judgment: Major concerns                                                                                                                                       |



|                                                                                                                                                                                                                                                                                                                       |                                                                                                                                                                                                                                                                                                                         |
|-----------------------------------------------------------------------------------------------------------------------------------------------------------------------------------------------------------------------------------------------------------------------------------------------------------------------|-------------------------------------------------------------------------------------------------------------------------------------------------------------------------------------------------------------------------------------------------------------------------------------------------------------------------|
| <b>Comparison</b><br><b>Evidence: mixed</b><br>NMA odds ratio: 4.436(0.360,54.615)<br>Direct odds ratio: 5.733(0.276,118.914)<br>Indirect odds ratio: 2.537(0.029,223.096)<br><b>Inconsistency measures</b><br>Ratio of odds ratios: 2.260(0.010,503.911)<br>P value: 0.767<br>Incoherence judgment: No concerns      | <b>Comparison</b><br><b>Evidence: mixed</b><br>NMA odds ratio: 7.120(0.481,105.436)<br>Direct odds ratio: 4.889(0.124,192.116)<br>Indirect odds ratio: 11.050(0.209,585.286)<br><b>Inconsistency measures</b><br>Ratio of odds ratios: 0.442(0.002,98.642)<br>P value: 0.767<br>Incoherence judgment: No concerns       |
| <b>Comparison</b><br><b>Evidence: mixed</b><br>NMA odds ratio: 1.051(0.154,7.195)<br>Direct odds ratio: 0.584(0.072,4.778)<br>Indirect odds ratio: 21.911(0.184,2606.856)<br><b>Inconsistency measures</b><br>Ratio of odds ratios: 0.027(0.000,4.935)<br>P value: 0.174<br>Incoherence judgment: No concerns         | <b>Comparison</b><br><b>Evidence: mixed</b><br>NMA odds ratio: 1.687(0.129,22.003)<br>Direct odds ratio: 14.286(0.260,786.270)<br>Indirect odds ratio: 0.381(0.013,10.807)<br><b>Inconsistency measures</b><br>Ratio of odds ratios: 37.487(0.203,6935.442)<br>P value: 0.174<br>Incoherence judgment: No concerns      |
| <b>Comparison</b><br><b>Evidence: mixed</b><br>NMA odds ratio: 0.567(0.013,24.150)<br>Direct odds ratio: 2.069(0.031,136.497)<br>Indirect odds ratio: 0.003(0.000,13.763)<br><b>Inconsistency measures</b><br>Ratio of odds ratios: 688.489(0.056,8431624.365)<br>P value: 0.174<br>Incoherence judgment: No concerns | <b>Comparison</b><br><b>Evidence: mixed</b><br>NMA odds ratio: 0.160(0.006,4.086)<br>Direct odds ratio: 0.034(0.001,1.231)<br>Indirect odds ratio: 155.369(0.081,299269.565)<br><b>Inconsistency measures</b><br>Ratio of odds ratios: 0.000(0.000,0.948)<br>P value: 0.049<br>Incoherence judgment: No concerns        |
| <b>Comparison</b><br><b>Evidence: direct</b><br>Direct odds ratio: 2.341(0.068,80.875)<br>Inconsistency measures: Not applicable<br>Incoherence judgment: Major concerns                                                                                                                                              | <b>Comparison</b><br><b>Evidence: mixed</b><br>NMA odds ratio: 0.172(0.016,1.899)<br>Direct odds ratio: 0.250(0.015,4.050)<br>Indirect odds ratio: 0.059(0.001,6.678)<br><b>Inconsistency measures</b><br>Ratio of odds ratios: 4.232(0.017,1024.336)<br>P value: 0.607<br>Incoherence judgment: No concerns            |
| <b>Comparison</b><br><b>Evidence: mixed</b><br>NMA odds ratio: 0.238(0.017,3.273)<br>Direct odds ratio: 0.148(0.004,5.901)<br>Indirect odds ratio: 0.387(0.009,16.092)<br><b>Inconsistency measures</b><br>Ratio of odds ratios: 0.381(0.002,72.125)<br>P value: 0.719<br>Incoherence judgment: No concerns           | <b>Comparison</b><br><b>Evidence: mixed</b><br>NMA odds ratio: 0.152(0.006,3.838)<br>Direct odds ratio: 0.668(0.019,23.171)<br>Indirect odds ratio: 0.000(0.000,0.293)<br><b>Inconsistency measures</b><br>Ratio of odds ratios: 5484.055(1.056,28485336.384)<br>P value: 0.049<br>Incoherence judgment: Major concerns |
| <b>Comparison</b><br><b>Evidence: mixed</b><br>NMA odds ratio: 9.325(0.502,173.157)<br>Direct odds ratio: 11.117(0.122,1010.499)<br>Indirect odds ratio: 8.211(0.177,380.201)<br><b>Inconsistency measures</b><br>Ratio of odds ratios: 1.354(0.004,504.214)<br>P value: 0.920<br>Incoherence judgment: No concerns   | <b>Comparison</b><br><b>Evidence: mixed</b><br>NMA odds ratio: 0.336(0.010,11.824)<br>Direct odds ratio: 0.145(0.003,6.228)<br>Indirect odds ratio: 476.515(0.008,29793475.960)<br><b>Inconsistency measures</b><br>Ratio of odds ratios: 0.000(0.000,35.431)<br>P value: 0.174<br>Incoherence judgment: No concerns    |

|                                                                                                                                                                                                                                                                                                             |                                                                                                                                                                                 |
|-------------------------------------------------------------------------------------------------------------------------------------------------------------------------------------------------------------------------------------------------------------------------------------------------------------|---------------------------------------------------------------------------------------------------------------------------------------------------------------------------------|
| <b>Comparison</b><br><b>Evidence: mixed</b><br>NMA odds ratio: 0.148(0.015,1.478)<br>Direct odds ratio: 0.191(0.013,2.757)<br>Indirect odds ratio: 0.073(0.001,6.608)<br><b>Inconsistency measures</b><br>Ratio of odds ratios: 2.623(0.014,496.111)<br>P value: 0.719<br>Incoherence judgment: No concerns | <b>Comparison</b><br><b>Evidence: indirect</b><br>Indirect odds ratio: 11.571(0.088,1526.603)<br>Inconsistency measures: Not applicable<br>Incoherence judgment: Major concerns |
| <b>Comparison</b><br><b>Evidence: indirect</b><br>Indirect odds ratio: 2.121(0.060,75.286)<br>Inconsistency measures: Not applicable<br>Incoherence judgment: Major concerns                                                                                                                                | <b>Comparison</b><br><b>Evidence: indirect</b><br>Indirect odds ratio: 8.950(0.328,243.886)<br>Inconsistency measures: Not applicable<br>Incoherence judgment: Major concerns   |
| <b>Comparison</b><br><b>Evidence: indirect</b><br>Indirect odds ratio: 6.451(0.062,674.317)<br>Inconsistency measures: Not applicable<br>Incoherence judgment: Major concerns                                                                                                                               | <b>Comparison</b><br><b>Evidence: indirect</b><br>Indirect odds ratio: 5.075(0.059,438.298)<br>Inconsistency measures: Not applicable<br>Incoherence judgment: Major concerns   |
| <b>Comparison</b><br><b>Evidence: indirect</b><br>Indirect odds ratio: 2.240(0.067,74.426)<br>Inconsistency measures: Not applicable<br>Incoherence judgment: Major concerns                                                                                                                                | <b>Comparison</b><br><b>Evidence: indirect</b><br>Indirect odds ratio: 1.433(0.020,100.816)<br>Inconsistency measures: Not applicable<br>Incoherence judgment: Major concerns   |
| <b>Comparison</b><br><b>Evidence: indirect</b><br>Indirect odds ratio: 0.183(0.002,20.017)<br>Inconsistency measures: Not applicable<br>Incoherence judgment: Major concerns                                                                                                                                | <b>Comparison</b><br><b>Evidence: indirect</b><br>Indirect odds ratio: 0.557(0.002,160.405)<br>Inconsistency measures: Not applicable<br>Incoherence judgment: Major concerns   |
| <b>Comparison</b><br><b>Evidence: indirect</b><br>Indirect odds ratio: 0.813(0.014,47.904)<br>Inconsistency measures: Not applicable<br>Incoherence judgment: Major concerns                                                                                                                                | <b>Comparison</b><br><b>Evidence: indirect</b><br>Indirect odds ratio: 0.140(0.001,15.044)<br>Inconsistency measures: Not applicable<br>Incoherence judgment: Major concerns    |
| <b>Comparison</b><br><b>Evidence: indirect</b><br>Indirect odds ratio: 1.305(0.016,108.115)<br>Inconsistency measures: Not applicable<br>Incoherence judgment: Major concerns                                                                                                                               | <b>Comparison</b><br><b>Evidence: indirect</b><br>Indirect odds ratio: 0.439(0.002,79.115)<br>Inconsistency measures: Not applicable<br>Incoherence judgment: Major concerns    |
| <b>Comparison</b><br><b>Evidence: indirect</b><br>Indirect odds ratio: 0.194(0.002,21.181)<br>Inconsistency measures: Not applicable<br>Incoherence judgment: Major concerns                                                                                                                                | <b>Comparison</b><br><b>Evidence: indirect</b><br>Indirect odds ratio: 0.124(0.001,15.635)<br>Inconsistency measures: Not applicable<br>Incoherence judgment: Major concerns    |
| <b>Comparison</b><br><b>Evidence: indirect</b><br>Indirect odds ratio: 4.220(0.206,86.349)<br>Inconsistency measures: Not applicable<br>Incoherence judgment: Major concerns                                                                                                                                | <b>Comparison</b><br><b>Evidence: indirect</b><br>Indirect odds ratio: 3.041(0.035,260.708)<br>Inconsistency measures: Not applicable<br>Incoherence judgment: Major concerns   |

|                                                                                                                                                                                              |                                                                                                                                                                                              |
|----------------------------------------------------------------------------------------------------------------------------------------------------------------------------------------------|----------------------------------------------------------------------------------------------------------------------------------------------------------------------------------------------|
| <b>Comparison</b><br><b>Evidence:</b> indirect<br>Indirect odds ratio: 0.764(0.027,21.452)<br>Inconsistency measures: Not applicable<br>Incoherence judgment <a href="#">Major concerns</a>  | <b>Comparison</b><br><b>Evidence:</b> indirect<br>Indirect odds ratio: 2.393(0.034,167.922)<br>Inconsistency measures: Not applicable<br>Incoherence judgment <a href="#">Major concerns</a> |
| <b>Comparison</b><br><b>Evidence:</b> indirect<br>Indirect odds ratio: 1.056(0.042,26.832)<br>Inconsistency measures: Not applicable<br>Incoherence judgment <a href="#">Major concerns</a>  | <b>Comparison</b><br><b>Evidence:</b> indirect<br>Indirect odds ratio: 0.676(0.012,38.199)<br>Inconsistency measures: Not applicable<br>Incoherence judgment <a href="#">Major concerns</a>  |
| <b>Comparison</b><br><b>Evidence:</b> indirect<br>Indirect odds ratio: 0.721(0.009,57.277)<br>Inconsistency measures: Not applicable<br>Incoherence judgment <a href="#">Major concerns</a>  | <b>Comparison</b><br><b>Evidence:</b> indirect<br>Indirect odds ratio: 0.181(0.009,3.612)<br>Inconsistency measures: Not applicable<br>Incoherence judgment <a href="#">Major concerns</a>   |
| <b>Comparison</b><br><b>Evidence:</b> indirect<br>Indirect odds ratio: 0.250(0.012,5.137)<br>Inconsistency measures: Not applicable<br>Incoherence judgment <a href="#">Major concerns</a>   | <b>Comparison</b><br><b>Evidence:</b> indirect<br>Indirect odds ratio: 1.459(0.022,97.251)<br>Inconsistency measures: Not applicable<br>Incoherence judgment <a href="#">Major concerns</a>  |
| <b>Comparison</b><br><b>Evidence:</b> indirect<br>Indirect odds ratio: 0.251(0.003,24.769)<br>Inconsistency measures: Not applicable<br>Incoherence judgment <a href="#">Major concerns</a>  | <b>Comparison</b><br><b>Evidence:</b> indirect<br>Indirect odds ratio: 0.787(0.005,119.426)<br>Inconsistency measures: Not applicable<br>Incoherence judgment <a href="#">Major concerns</a> |
| <b>Comparison</b><br><b>Evidence:</b> indirect<br>Indirect odds ratio: 0.347(0.005,23.691)<br>Inconsistency measures: Not applicable<br>Incoherence judgment <a href="#">Major concerns</a>  | <b>Comparison</b><br><b>Evidence:</b> indirect<br>Indirect odds ratio: 0.222(0.001,40.029)<br>Inconsistency measures: Not applicable<br>Incoherence judgment <a href="#">Major concerns</a>  |
| <b>Comparison</b><br><b>Evidence:</b> indirect<br>Indirect odds ratio: 1.605(0.168,15.322)<br>Inconsistency measures: Not applicable<br>Incoherence judgment <a href="#">Major concerns</a>  | <b>Comparison</b><br><b>Evidence:</b> indirect<br>Indirect odds ratio: 0.539(0.012,24.690)<br>Inconsistency measures: Not applicable<br>Incoherence judgment <a href="#">Major concerns</a>  |
| <b>Comparison</b><br><b>Evidence:</b> indirect<br>Indirect odds ratio: 3.134(0.041,238.913)<br>Inconsistency measures: Not applicable<br>Incoherence judgment <a href="#">Major concerns</a> | <b>Comparison</b><br><b>Evidence:</b> indirect<br>Indirect odds ratio: 1.383(0.049,38.784)<br>Inconsistency measures: Not applicable<br>Incoherence judgment <a href="#">Major concerns</a>  |
| <b>Comparison</b><br><b>Evidence:</b> indirect<br>Indirect odds ratio: 0.885(0.016,47.904)<br>Inconsistency measures: Not applicable<br>Incoherence judgment <a href="#">Major concerns</a>  | <b>Comparison</b><br><b>Evidence:</b> indirect<br>Indirect odds ratio: 0.095(0.002,4.236)<br>Inconsistency measures: Not applicable<br>Incoherence judgment <a href="#">Major concerns</a>   |
| <b>Comparison</b><br><b>Evidence:</b> indirect<br>Indirect odds ratio: 0.441(0.007,26.851)<br>Inconsistency measures: Not applicable<br>Incoherence judgment <a href="#">Major concerns</a>  | <b>Comparison</b><br><b>Evidence:</b> indirect<br>Indirect odds ratio: 0.282(0.002,34.012)<br>Inconsistency measures: Not applicable<br>Incoherence judgment <a href="#">Major concerns</a>  |

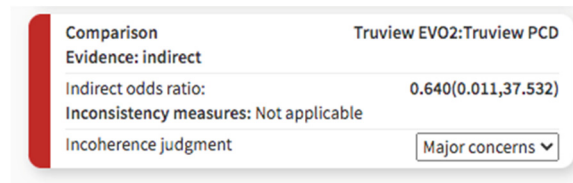

Figure S8. Results of inconsistency of the secondary outcome (glottic visualization).

|                                                               |  |                                                                                    |                                                                                            |                                             |
|---------------------------------------------------------------|--|------------------------------------------------------------------------------------|--------------------------------------------------------------------------------------------|---------------------------------------------|
| Patients: pediatric patients who received tracheal intubation |  | 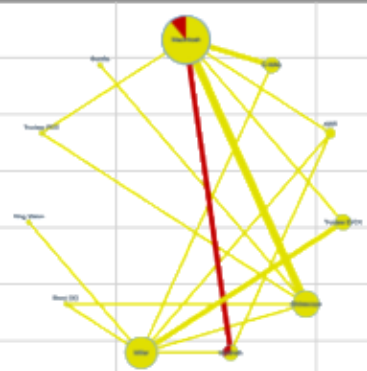 |                                                                                            |                                             |
| Interventions: indirect laryngoscope, direct laryngoscope     |  |                                                                                    |                                                                                            |                                             |
| Comparator (reference): macintosh laryngoscope                |  |                                                                                    |                                                                                            |                                             |
| Outcome: glottic visualization                                |  |                                                                                    |                                                                                            |                                             |
| Setting: elective surgery                                     |  |                                                                                    |                                                                                            |                                             |
| Total studies: 16 RCT<br>Total Participants: 1459             |  | Relative effect<br>(95% CI)                                                        | Certainty of evidence                                                                      | Reasons for downgrading                     |
| Airway scope<br>(2 RCT; 195 participants)                     |  | 0.14 (0.02-1.16)                                                                   | <br>Low   | Risk of bias and imprecision                |
| Bonfils<br>(1 RCT; 91 participants)                           |  | 0.095 (0.06-14.7)                                                                  | <br>Low | Risk of bias and imprecision                |
| C-MAC<br>(2 RCT; 116 participants)                            |  | 0.27 (0.04-1.76)                                                                   | <br>Low | Risk of bias and imprecision                |
| Glidescope<br>(3 RCT; 226 participants)                       |  | 0.76 (0.21-2.78)                                                                   | <br>Low | Risk of bias and imprecision                |
| King Vision<br>(1 RCT; 100 participants)                      |  | 0.64 (0.04-11.3)                                                                   | <br>Low | Risk of bias and imprecision                |
| Macintosh<br>(9 RCT; 384 participants)                        |  | No estimable                                                                       | Reference comparator                                                                       | No estimable                                |
| McGrath<br>(2 RCT; 216 participants)                          |  | 0.21 (0.03-1.24)                                                                   | <br>Low | Risk of bias, imprecision and heterogeneity |
| Miller<br>(5 RCT; 489 participants)                           |  | 1.38 (0.27-6.93)                                                                   | <br>Low | Risk of bias and imprecision                |
| Storz DCI<br>(1 RCT; 62 participants)                         |  | 0.46 (0.03-7.39)                                                                   | <br>Low | Risk of bias and imprecision                |
| Truview EVO2<br>(1 RCT; 50 participants)                      |  | 0.31 (0.05-1.87)                                                                   | <br>Low | Risk of bias and imprecision                |
| Truview PCD<br>(2 RCT; 156 participants)                      |  | 0.32 (0.04-2.73)                                                                   | <br>Low | Risk of bias and imprecision                |
| RCT: Randomized controlled trial, CI: Confidence interval     |  |                                                                                    |                                                                                            |                                             |

Figure S9. Summary of findings table for the secondary outcome (glottic visualization).



|                      |                      |                      |                   |                      |                   |                   |                     |                     |                     |                    |                    |                   |                     |
|----------------------|----------------------|----------------------|-------------------|----------------------|-------------------|-------------------|---------------------|---------------------|---------------------|--------------------|--------------------|-------------------|---------------------|
| Airtaq               |                      |                      |                   |                      |                   |                   |                     | 1.2 (-5.6; 7.9)     |                     | -3.6 (-14.6; 7.4)  |                    |                   |                     |
| -1.4 (-9.1; 6.4)     | AWS                  |                      |                   |                      |                   |                   |                     | 2.4 (-3.4; 8.2)     | 0.3 (-8.3; 9.0)     | -4.0 (-16.6; 8.6)  |                    |                   |                     |
| 5.8 (-8.0; 19.6)     |                      | 7.2 (-6.3; 20.8)     | Bonfils           |                      |                   |                   | -12.2 (-24.0; -0.4) |                     |                     |                    |                    |                   |                     |
| -37.0 (-56.0; -18.0) | -35.6 (-54.4; -16.8) | -42.8 (-64.8; -20.8) | Bullard           |                      |                   |                   |                     | 37.0 (18.9; 55.1)   |                     |                    |                    |                   |                     |
| 9.4 (0.3; 18.5)      | 10.8 (2.0; 19.6)     | 3.6 (-10.7; 17.9)    | 46.4 (26.9; 65.9) | C-MAC                |                   |                   |                     | -13.0 (-22.0; -4.0) | -6.1 (-17.9; 5.7)   |                    |                    |                   | -12.7 (-26.2; 0.8)  |
| -6.4 (-13.5; 0.8)    | -5.0 (-11.7; 1.7)    | -12.2 (-24.0; 0.4)   | 30.6 (12.0; 49.2) | -15.8 (-24.0; -7.6)  | Glidescope        |                   |                     | 8.8 (3.8; 13.8)     | 0.9 (-7.6; 9.4)     | -8.9 (-21.3; 3.5)  |                    |                   | -5.0 (-19.6; 9.6)   |
| -3.6 (-13.4; 6.2)    | -2.2 (-11.8; 7.3)    | -9.4 (-24.3; 5.4)    | 33.4 (13.5; 53.3) | -13.0 (-23.6; -2.5)  | 2.8 (-6.3; 11.8)  | King Vision       |                     | 0.9 (-10.2; 11.9)   | 5.9 (-5.3; 17.1)    |                    |                    |                   |                     |
| 0.0 (-5.9; 6.0)      | 1.4 (-3.8; 6.6)      | -5.8 (-18.4; 6.8)    | 37.0 (18.9; 55.1) | -9.4 (-16.7; 2.1)    | -6.4 (2.0; 10.9)  |                   | 3.6 (-4.6; 11.9)    | -3.4 (-10.0; 3.3)   |                     | -6.5 (-18.5; 5.5)  | 5.9 (-5.2; 17.0)   |                   | -14.9 (-24.1; -5.8) |
| -2.2 (-10.2; 5.9)    | -0.8 (-7.4; 5.8)     | -8.0 (-21.8; 5.7)    | 34.8 (15.8; 53.7) | -11.6 (-20.7; -2.6)  | 4.2 (-2.9; 11.2)  |                   | 1.4 (-8.4; 11.2)    | -2.2 (-7.9; 3.4)    | McGrath             | -0.5 (-13.1; 12.1) |                    |                   |                     |
| -0.5 (-7.4; 6.3)     | 0.9 (-5.9; 7.6)      | -6.4 (-19.5; 6.8)    | 36.5 (17.7; 55.2) | -10.0 (-17.7; -2.2)  | 5.8 (0.1; 11.6)   |                   | 3.1 (-5.2; 11.3)    | -0.6 (-5.6; 4.5)    | 1.7 (-5.4; 8.7)     | Miller             | -10.0 (-22.0; 2.0) | -4.6 (-12.5; 3.4) |                     |
| -9.9 (-19.9; 0.0)    | -8.6 (-18.2; 1.1)    | -15.8 (-30.4; 1.2)   | -27.0 (7.2; 46.9) | -19.4 (-30.1; -8.7)  | -3.6 (-12.2; 5.0) | -6.4 (-17.6; 4.9) | -10.0 (-18.2; -1.7) | -7.8 (-17.6; 2.1)   | -9.4 (-18.1; -0.7)  | Storz DCI          |                    |                   |                     |
| -1.4 (-10.2; 7.5)    | 0.0 (-8.6; 8.7)      | -7.2 (-21.4; 7.1)    | 35.6 (16.1; 55.1) | -10.8 (-20.5; -1.1)  | 5.0 (-3.0; 13.1)  | 2.2 (-8.0; 12.4)  | -1.4 (-8.7; 5.9)    | 0.8 (-8.1; 9.8)     | -0.8 (-7.5; 5.9)    | 8.6 (-1.8; 19.0)   | Truview EVO2       |                   |                     |
| -11.4 (-21.6; 1.2)   | -10.0 (-19.9; 0.2)   | -17.2 (-32.1; 2.4)   | -25.6 (5.6; 45.5) | -20.8 (-30.7; -11.0) | -5.0 (-14.1; 4.1) | -7.8 (-19.5; 3.8) | -11.4 (-19.9; -3.0) | -9.2 (-19.3; 0.9)   | -10.9 (-20.4; -1.4) | -1.5 (-13.1; 10.2) | -10.1 (-21.0; 0.9) | Truview PCD       |                     |

Figure S10. League table of the secondary outcome (intubation time).

|                                                                                                                                                                                                                                                                                                                                              |               |                                                                                                                                                                                                                                                                                                                                             |                    |
|----------------------------------------------------------------------------------------------------------------------------------------------------------------------------------------------------------------------------------------------------------------------------------------------------------------------------------------------|---------------|---------------------------------------------------------------------------------------------------------------------------------------------------------------------------------------------------------------------------------------------------------------------------------------------------------------------------------------------|--------------------|
| <b>Comparison</b><br><b>Evidence: mixed</b><br>NMA mean difference: 1.415(-3.768,6.598)<br>Direct mean difference: 2.428(-3.387,8.243)<br>Indirect mean difference: -2.501(-13.935,8.934)<br><b>Inconsistency measures</b><br>Difference of mean differences: 4.929(-7.899,17.757)<br>P value: 0.451<br>Incoherence judgment: No concerns    | AWS:Macintosh | <b>Comparison</b><br><b>Evidence: mixed</b><br>NMA mean difference: -0.812(-7.432,5.808)<br>Direct mean difference: 0.330(-8.293,8.953)<br>Indirect mean difference: -2.451(-12.781,7.879)<br><b>Inconsistency measures</b><br>Difference of mean differences: 2.780(-10.676,16.237)<br>P value: 0.685<br>Incoherence judgment: No concerns | AWS:McGrath        |
| <b>Comparison</b><br><b>Evidence: mixed</b><br>NMA mean difference: 0.858(-5.885,7.600)<br>Direct mean difference: -4.000(-16.599,8.599)<br>Indirect mean difference: 2.807(-5.174,10.788)<br><b>Inconsistency measures</b><br>Difference of mean differences: -6.807(-21.721,8.107)<br>P value: 0.371<br>Incoherence judgment: No concerns  | AWS:Miller    | <b>Comparison</b><br><b>Evidence: mixed</b><br>NMA mean difference: 0.036(-5.885,5.957)<br>Direct mean difference: 1.195(-5.558,7.949)<br>Indirect mean difference: -3.814(-16.125,8.496)<br><b>Inconsistency measures</b><br>Difference of mean differences: 5.010(-9.032,19.051)<br>P value: 0.484<br>Incoherence judgment: No concerns   | Airtaq:Macintosh   |
| <b>Comparison</b><br><b>Evidence: mixed</b><br>NMA mean difference: -0.521(-7.355,6.312)<br>Direct mean difference: -3.600(-14.607,7.407)<br>Indirect mean difference: 1.409(-7.308,10.127)<br><b>Inconsistency measures</b><br>Difference of mean differences: -5.010(-19.051,9.032)<br>P value: 0.484<br>Incoherence judgment: No concerns | Airtaq:Miller | <b>Comparison</b><br><b>Evidence: direct</b><br>Direct mean difference: -12.200(-23.972,-0.428)<br>Inconsistency measures: Not applicable<br>Incoherence judgment: No concerns                                                                                                                                                              | Bonfils:Glidescope |



|                                                                                                                                                                                                                                                                                                                                                                         |                                                                                                                                                                                                                                                                                                                                                                                 |
|-------------------------------------------------------------------------------------------------------------------------------------------------------------------------------------------------------------------------------------------------------------------------------------------------------------------------------------------------------------------------|---------------------------------------------------------------------------------------------------------------------------------------------------------------------------------------------------------------------------------------------------------------------------------------------------------------------------------------------------------------------------------|
| <b>Comparison</b><br><b>Evidence: direct</b><br>Direct mean difference: 37.020(18.938,55.102)<br>Inconsistency measures: Not applicable<br>Incoherence judgment <input type="button" value="No concerns"/>                                                                                                                                                              | <b>Comparison</b><br><b>Evidence: mixed</b><br>NMA mean difference: -9.396(-16.662,-2.131)<br>Direct mean difference: -12.989(-21.991,-3.987)<br>Indirect mean difference: -2.679(-14.988,9.630)<br>Inconsistency measures<br>Difference of mean differences: -10.310(-25.560,4.939)<br>P value: 0.185<br>Incoherence judgment <input type="button" value="No concerns"/>       |
| <b>Comparison</b><br><b>Evidence: mixed</b><br>NMA mean difference: -9.954(-17.686,-2.222)<br>Direct mean difference: -6.100(-17.864,5.664)<br>Indirect mean difference: -12.885(-23.143,-2.626)<br>Inconsistency measures<br>Difference of mean differences: 6.785(-8.824,22.394)<br>P value: 0.394<br>Incoherence judgment <input type="button" value="No concerns"/> | <b>Comparison</b><br><b>Evidence: mixed</b><br>NMA mean difference: -20.845(-30.714,-10.976)<br>Direct mean difference: -12.700(-26.180,0.780)<br>Indirect mean difference: -30.253(-44.741,-15.765)<br>Inconsistency measures<br>Difference of mean differences: 17.553(-2.236,37.342)<br>P value: 0.082<br>Incoherence judgment <input type="button" value="Major concerns"/> |
| <b>Comparison</b><br><b>Evidence: mixed</b><br>NMA mean difference: 6.406(1.952,10.859)<br>Direct mean difference: 8.799(3.756,13.842)<br>Indirect mean difference: -2.068(-11.557,7.421)<br>Inconsistency measures<br>Difference of mean differences: 10.867(0.121,21.613)<br>P value: 0.048<br>Incoherence judgment <input type="button" value="Major concerns"/>     | <b>Comparison</b><br><b>Evidence: mixed</b><br>NMA mean difference: 5.848(0.085,11.611)<br>Direct mean difference: 0.913(-7.601,9.427)<br>Indirect mean difference: 10.022(2.192,17.852)<br>Inconsistency measures<br>Difference of mean differences: -9.109(-20.676,2.458)<br>P value: 0.123<br>Incoherence judgment <input type="button" value="No concerns"/>                |
| <b>Comparison</b><br><b>Evidence: mixed</b><br>NMA mean difference: -3.578(-12.194,5.038)<br>Direct mean difference: -8.900(-21.301,3.501)<br>Indirect mean difference: 1.389(-10.592,13.369)<br>Inconsistency measures<br>Difference of mean differences: -10.289(-27.531,6.954)<br>P value: 0.242<br>Incoherence judgment <input type="button" value="No concerns"/>  | <b>Comparison</b><br><b>Evidence: mixed</b><br>NMA mean difference: -5.043(-14.141,4.056)<br>Direct mean difference: -5.000(-19.564,9.564)<br>Indirect mean difference: -5.070(-16.722,6.583)<br>Inconsistency measures<br>Difference of mean differences: 0.070(-18.582,18.721)<br>P value: 0.994<br>Incoherence judgment <input type="button" value="No concerns"/>           |
| <b>Comparison</b><br><b>Evidence: mixed</b><br>NMA mean difference: 3.625(-4.616,11.866)<br>Direct mean difference: 0.870(-10.159,11.899)<br>Indirect mean difference: 7.107(-5.293,19.508)<br>Inconsistency measures<br>Difference of mean differences: -6.237(-22.833,10.358)<br>P value: 0.461<br>Incoherence judgment <input type="button" value="No concerns"/>    | <b>Comparison</b><br><b>Evidence: mixed</b><br>NMA mean difference: 3.067(-5.196,11.330)<br>Direct mean difference: 5.900(-5.284,17.084)<br>Indirect mean difference: -0.338(-12.598,11.924)<br>Inconsistency measures<br>Difference of mean differences: 6.237(-10.358,22.833)<br>P value: 0.461<br>Incoherence judgment <input type="button" value="No concerns"/>            |
| <b>Comparison</b><br><b>Evidence: mixed</b><br>NMA mean difference: -2.227(-7.896,3.442)<br>Direct mean difference: -3.357(-9.972,3.258)<br>Indirect mean difference: 0.897(-10.104,11.898)<br>Inconsistency measures<br>Difference of mean differences: -4.254(-17.090,8.583)<br>P value: 0.516<br>Incoherence judgment <input type="button" value="No concerns"/>     | <b>Comparison</b><br><b>Evidence: mixed</b><br>NMA mean difference: -9.984(-18.249,-1.719)<br>Direct mean difference: -6.500(-18.503,5.503)<br>Indirect mean difference: -13.125(-24.521,-1.728)<br>Inconsistency measures<br>Difference of mean differences: 6.625(-9.927,23.177)<br>P value: 0.433<br>Incoherence judgment <input type="button" value="No concerns"/>         |

|                                                                                                                                                                                                                                                                                                                                               |                                                                                                                                                                                                                                                                                                                                                         |
|-----------------------------------------------------------------------------------------------------------------------------------------------------------------------------------------------------------------------------------------------------------------------------------------------------------------------------------------------|---------------------------------------------------------------------------------------------------------------------------------------------------------------------------------------------------------------------------------------------------------------------------------------------------------------------------------------------------------|
| <b>Comparison</b><br><b>Evidence: mixed</b><br>NMA mean difference: -1.389(-8.670,5.892)<br>Direct mean difference: 5.900(-5.207,17.007)<br>Indirect mean difference: -6.883(-16.525,2.760)<br><b>Inconsistency measures</b><br>Difference of mean differences: 12.783(-1.926,27.491)<br>P value: 0.088<br>Incoherence judgment: No concerns  | <b>Comparison</b><br><b>Evidence: mixed</b><br>NMA mean difference: -11.448(-19.883,-3.014)<br>Direct mean difference: -14.944(-24.052,-5.835)<br>Indirect mean difference: 9.594(-12.754,31.943)<br><b>Inconsistency measures</b><br>Difference of mean differences: -24.538(-48.671,-0.405)<br>P value: 0.046<br>Incoherence judgment: Major concerns |
| <b>Comparison</b><br><b>Evidence: mixed</b><br>NMA mean difference: 1.670(-5.374,8.713)<br>Direct mean difference: -0.500(-13.079,12.079)<br>Indirect mean difference: 2.660(-5.840,11.162)<br><b>Inconsistency measures</b><br>Difference of mean differences: -3.160(-18.342,12.021)<br>P value: 0.683<br>Incoherence judgment: No concerns | <b>Comparison</b><br><b>Evidence: mixed</b><br>NMA mean difference: -9.426(-18.109,-0.744)<br>Direct mean difference: -10.000(-21.965,1.966)<br>Indirect mean difference: -8.788(-21.407,3.831)<br><b>Inconsistency measures</b><br>Difference of mean differences: -1.212(-18.602,16.178)<br>P value: 0.891<br>Incoherence judgment: No concerns       |
| <b>Comparison</b><br><b>Evidence: mixed</b><br>NMA mean difference: -0.831(-7.519,5.856)<br>Direct mean difference: -4.564(-12.512,3.384)<br>Indirect mean difference: 8.219(-4.157,20.595)<br><b>Inconsistency measures</b><br>Difference of mean differences: -12.783(-27.491,1.926)<br>P value: 0.088<br>Incoherence judgment: No concerns | <b>Comparison</b><br><b>Evidence: indirect</b><br>Indirect mean difference: -1.379(-9.123,6.366)<br>Inconsistency measures: Not applicable<br>Incoherence judgment: No concerns                                                                                                                                                                         |
| <b>Comparison</b><br><b>Evidence: indirect</b><br>Indirect mean difference: 7.210(-6.340,20.759)<br>Inconsistency measures: Not applicable<br>Incoherence judgment: No concerns                                                                                                                                                               | <b>Comparison</b><br><b>Evidence: indirect</b><br>Indirect mean difference: -35.605(-54.415,-16.795)<br>Inconsistency measures: Not applicable<br>Incoherence judgment: No concerns                                                                                                                                                                     |
| <b>Comparison</b><br><b>Evidence: indirect</b><br>Indirect mean difference: 10.812(2.033,19.591)<br>Inconsistency measures: Not applicable<br>Incoherence judgment: No concerns                                                                                                                                                               | <b>Comparison</b><br><b>Evidence: indirect</b><br>Indirect mean difference: -4.990(-11.698,1.717)<br>Inconsistency measures: Not applicable<br>Incoherence judgment: No concerns                                                                                                                                                                        |
| <b>Comparison</b><br><b>Evidence: indirect</b><br>Indirect mean difference: -2.210(-11.764,7.344)<br>Inconsistency measures: Not applicable<br>Incoherence judgment: No concerns                                                                                                                                                              | <b>Comparison</b><br><b>Evidence: indirect</b><br>Indirect mean difference: -8.569(-18.192,1.054)<br>Inconsistency measures: Not applicable<br>Incoherence judgment: No concerns                                                                                                                                                                        |
| <b>Comparison</b><br><b>Evidence: indirect</b><br>Indirect mean difference: 0.026(-8.645,8.697)<br>Inconsistency measures: Not applicable<br>Incoherence judgment: No concerns                                                                                                                                                                | <b>Comparison</b><br><b>Evidence: indirect</b><br>Indirect mean difference: -10.033(-19.886,-0.180)<br>Inconsistency measures: Not applicable<br>Incoherence judgment: No concerns                                                                                                                                                                      |
| <b>Comparison</b><br><b>Evidence: indirect</b><br>Indirect mean difference: 5.831(-7.957,19.619)<br>Inconsistency measures: Not applicable<br>Incoherence judgment: No concerns                                                                                                                                                               | <b>Comparison</b><br><b>Evidence: indirect</b><br>Indirect mean difference: -36.984(-56.010,-17.957)<br>Inconsistency measures: Not applicable<br>Incoherence judgment: No concerns                                                                                                                                                                     |

|                                                                                                                                                                                                |                                                                                                                                                                                                 |
|------------------------------------------------------------------------------------------------------------------------------------------------------------------------------------------------|-------------------------------------------------------------------------------------------------------------------------------------------------------------------------------------------------|
| <b>Comparison</b><br><b>Evidence: indirect</b><br>Indirect mean difference: 9.433(0.337,18.529)<br>Inconsistency measures: Not applicable<br>Incoherence judgment <span>No concerns</span>     | <b>Comparison</b><br><b>Evidence: indirect</b><br>Indirect mean difference: -6.369(-13.547,0.808)<br>Inconsistency measures: Not applicable<br>Incoherence judgment <span>No concerns</span>    |
| <b>Comparison</b><br><b>Evidence: indirect</b><br>Indirect mean difference: -3.589(-13.389,6.212)<br>Inconsistency measures: Not applicable<br>Incoherence judgment <span>No concerns</span>   | <b>Comparison</b><br><b>Evidence: indirect</b><br>Indirect mean difference: -2.191(-10.250,5.868)<br>Inconsistency measures: Not applicable<br>Incoherence judgment <span>No concerns</span>    |
| <b>Comparison</b><br><b>Evidence: indirect</b><br>Indirect mean difference: -9.948(-19.861,-0.034)<br>Inconsistency measures: Not applicable<br>Incoherence judgment <span>No concerns</span>  | <b>Comparison</b><br><b>Evidence: indirect</b><br>Indirect mean difference: -1.353(-10.228,7.523)<br>Inconsistency measures: Not applicable<br>Incoherence judgment <span>No concerns</span>    |
| <b>Comparison</b><br><b>Evidence: indirect</b><br>Indirect mean difference: -11.412(-21.629,-1.195)<br>Inconsistency measures: Not applicable<br>Incoherence judgment <span>No concerns</span> | <b>Comparison</b><br><b>Evidence: indirect</b><br>Indirect mean difference: -42.814(-64.845,-20.783)<br>Inconsistency measures: Not applicable<br>Incoherence judgment <span>No concerns</span> |
| <b>Comparison</b><br><b>Evidence: indirect</b><br>Indirect mean difference: 3.602(-10.737,17.941)<br>Inconsistency measures: Not applicable<br>Incoherence judgment <span>No concerns</span>   | <b>Comparison</b><br><b>Evidence: indirect</b><br>Indirect mean difference: -9.419(-24.261,5.422)<br>Inconsistency measures: Not applicable<br>Incoherence judgment <span>No concerns</span>    |
| <b>Comparison</b><br><b>Evidence: indirect</b><br>Indirect mean difference: -5.794(-18.381,6.792)<br>Inconsistency measures: Not applicable<br>Incoherence judgment <span>No concerns</span>   | <b>Comparison</b><br><b>Evidence: indirect</b><br>Indirect mean difference: -8.022(-21.754,5.711)<br>Inconsistency measures: Not applicable<br>Incoherence judgment <span>No concerns</span>    |
| <b>Comparison</b><br><b>Evidence: indirect</b><br>Indirect mean difference: -6.352(-19.459,6.755)<br>Inconsistency measures: Not applicable<br>Incoherence judgment <span>No concerns</span>   | <b>Comparison</b><br><b>Evidence: indirect</b><br>Indirect mean difference: -15.778(-30.367,-1.190)<br>Inconsistency measures: Not applicable<br>Incoherence judgment <span>No concerns</span>  |
| <b>Comparison</b><br><b>Evidence: indirect</b><br>Indirect mean difference: -7.183(-21.441,7.075)<br>Inconsistency measures: Not applicable<br>Incoherence judgment <span>No concerns</span>   | <b>Comparison</b><br><b>Evidence: indirect</b><br>Indirect mean difference: -17.243(-32.121,-2.364)<br>Inconsistency measures: Not applicable<br>Incoherence judgment <span>No concerns</span>  |
| <b>Comparison</b><br><b>Evidence: indirect</b><br>Indirect mean difference: 46.416(26.929,65.904)<br>Inconsistency measures: Not applicable<br>Incoherence judgment <span>No concerns</span>   | <b>Comparison</b><br><b>Evidence: indirect</b><br>Indirect mean difference: 30.614(11.992,49.236)<br>Inconsistency measures: Not applicable<br>Incoherence judgment <span>No concerns</span>    |
| <b>Comparison</b><br><b>Evidence: indirect</b><br>Indirect mean difference: 33.395(13.524,53.266)<br>Inconsistency measures: Not applicable<br>Incoherence judgment <span>No concerns</span>   | <b>Comparison</b><br><b>Evidence: indirect</b><br>Indirect mean difference: 34.793(15.843,53.742)<br>Inconsistency measures: Not applicable<br>Incoherence judgment <span>No concerns</span>    |



|                                                                                                                                                                                                                  |                                                                                                                                                                                                                  |
|------------------------------------------------------------------------------------------------------------------------------------------------------------------------------------------------------------------|------------------------------------------------------------------------------------------------------------------------------------------------------------------------------------------------------------------|
| <b>Comparison</b><br><b>Evidence:</b> indirect<br>Indirect mean difference: 36.462(17.683,55.241)<br>Inconsistency measures: Not applicable<br>Incoherence judgment <input type="button" value="No concerns"/>   | <b>Comparison</b><br><b>Evidence:</b> indirect<br>Indirect mean difference: 27.036(7.155,46.917)<br>Inconsistency measures: Not applicable<br>Incoherence judgment <input type="button" value="No concerns"/>    |
| <b>Comparison</b><br><b>Evidence:</b> indirect<br>Indirect mean difference: 35.631(16.138,55.124)<br>Inconsistency measures: Not applicable<br>Incoherence judgment <input type="button" value="No concerns"/>   | <b>Comparison</b><br><b>Evidence:</b> indirect<br>Indirect mean difference: 25.572(5.619,45.524)<br>Inconsistency measures: Not applicable<br>Incoherence judgment <input type="button" value="No concerns"/>    |
| <b>Comparison</b><br><b>Evidence:</b> indirect<br>Indirect mean difference: -15.802(-23.989,-7.616)<br>Inconsistency measures: Not applicable<br>Incoherence judgment <input type="button" value="No concerns"/> | <b>Comparison</b><br><b>Evidence:</b> indirect<br>Indirect mean difference: -13.021(-23.580,-2.463)<br>Inconsistency measures: Not applicable<br>Incoherence judgment <input type="button" value="No concerns"/> |
| <b>Comparison</b><br><b>Evidence:</b> indirect<br>Indirect mean difference: -11.624(-20.676,-2.572)<br>Inconsistency measures: Not applicable<br>Incoherence judgment <input type="button" value="No concerns"/> | <b>Comparison</b><br><b>Evidence:</b> indirect<br>Indirect mean difference: -19.380(-30.059,-8.702)<br>Inconsistency measures: Not applicable<br>Incoherence judgment <input type="button" value="No concerns"/> |
| <b>Comparison</b><br><b>Evidence:</b> indirect<br>Indirect mean difference: -10.786(-20.452,-1.119)<br>Inconsistency measures: Not applicable<br>Incoherence judgment <input type="button" value="No concerns"/> | <b>Comparison</b><br><b>Evidence:</b> indirect<br>Indirect mean difference: 2.781(-6.257,11.818)<br>Inconsistency measures: Not applicable<br>Incoherence judgment <input type="button" value="No concerns"/>    |
| <b>Comparison</b><br><b>Evidence:</b> indirect<br>Indirect mean difference: 4.178(-2.893,11.249)<br>Inconsistency measures: Not applicable<br>Incoherence judgment <input type="button" value="No concerns"/>    | <b>Comparison</b><br><b>Evidence:</b> indirect<br>Indirect mean difference: 5.017(-3.027,13.061)<br>Inconsistency measures: Not applicable<br>Incoherence judgment <input type="button" value="No concerns"/>    |
| <b>Comparison</b><br><b>Evidence:</b> indirect<br>Indirect mean difference: 1.398(-8.400,11.195)<br>Inconsistency measures: Not applicable<br>Incoherence judgment <input type="button" value="No concerns"/>    | <b>Comparison</b><br><b>Evidence:</b> indirect<br>Indirect mean difference: -6.359(-17.630,4.912)<br>Inconsistency measures: Not applicable<br>Incoherence judgment <input type="button" value="No concerns"/>   |
| <b>Comparison</b><br><b>Evidence:</b> indirect<br>Indirect mean difference: 2.236(-7.971,12.443)<br>Inconsistency measures: Not applicable<br>Incoherence judgment <input type="button" value="No concerns"/>    | <b>Comparison</b><br><b>Evidence:</b> indirect<br>Indirect mean difference: -7.823(-19.476,3.829)<br>Inconsistency measures: Not applicable<br>Incoherence judgment <input type="button" value="No concerns"/>   |
| <b>Comparison</b><br><b>Evidence:</b> indirect<br>Indirect mean difference: -0.558(-5.627,4.512)<br>Inconsistency measures: Not applicable<br>Incoherence judgment <input type="button" value="No concerns"/>    | <b>Comparison</b><br><b>Evidence:</b> indirect<br>Indirect mean difference: -7.757(-17.629,2.116)<br>Inconsistency measures: Not applicable<br>Incoherence judgment <input type="button" value="No concerns"/>   |
| <b>Comparison</b><br><b>Evidence:</b> indirect<br>Indirect mean difference: 0.838(-8.090,9.767)<br>Inconsistency measures: Not applicable<br>Incoherence judgment <input type="button" value="No concerns"/>     | <b>Comparison</b><br><b>Evidence:</b> indirect<br>Indirect mean difference: -9.221(-19.331,0.889)<br>Inconsistency measures: Not applicable<br>Incoherence judgment <input type="button" value="No concerns"/>   |

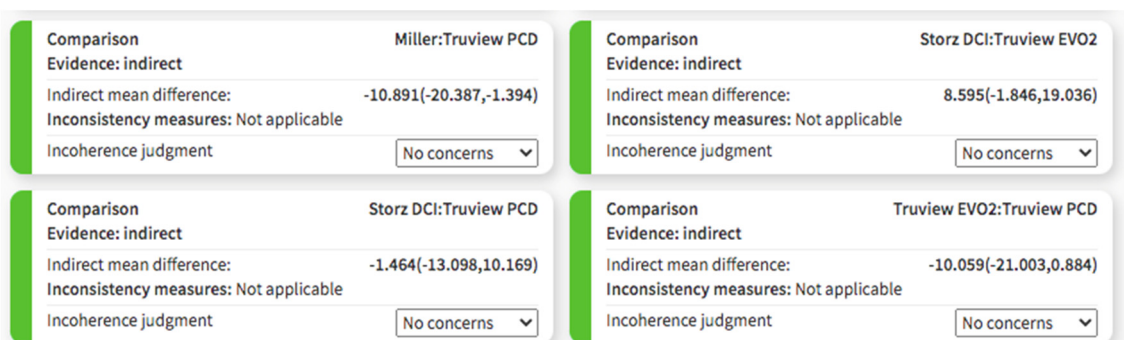

Figure S11. Results of inconsistency of the secondary outcome (intubation time).

| <b>Patients:</b> pediatric patients who received tracheal intubation<br><b>Interventions:</b> indirect laryngoscope, miller laryngoscope<br><b>Comparator (reference):</b> macintosh laryngoscope<br><b>Outcome:</b> intubation time<br><b>Setting:</b> elective surgery |                             |                       |                                |         |
|--------------------------------------------------------------------------------------------------------------------------------------------------------------------------------------------------------------------------------------------------------------------------|-----------------------------|-----------------------|--------------------------------|---------|
| Total studies: 31 RCT<br>Total Participants: 2599                                                                                                                                                                                                                        | Mean difference<br>(95% CI) | Certainty of evidence | Reasons for downgrading        | P score |
| Airtraq<br>(1 RCT; 34 participants)                                                                                                                                                                                                                                      | 0.56 (-5.88 to 5.96)        | ⊕⊕⊕⊕<br>Low           | Risk of bias and imprecision   | 0.66    |
| Airway scope<br>(2 RCT; 216 participants)                                                                                                                                                                                                                                | 1.42 (-3.77 to 6.60)        | ⊕⊕⊕⊕<br>Low           | Risk of bias and imprecision   | 0.57    |
| Bonfils<br>(1 RCT; 44 participants)                                                                                                                                                                                                                                      | -5.79 (-18.4-6.79)          | ⊕⊕⊕⊕<br>Low           | Risk of bias and imprecision   | 0.85    |
| Bullard<br>(1 RCT; 40 participants)                                                                                                                                                                                                                                      | 37.0 (18.9 to 55.1)         | ⊕⊕⊕⊕⊕<br>Moderate     | Risk of bias                   | 0.001   |
| C-MAC<br>(2 RCT; 131 participants)                                                                                                                                                                                                                                       | -9.40 (-16.7 to -2.13)      | ⊕⊕⊕⊕<br>Low           | Risk of bias and heterogeneity | 0.97    |
| Glidescope<br>(7 RCT; 671 participants)                                                                                                                                                                                                                                  | 6.41 (1.95-10.9)            | ⊕⊕⊕⊕<br>Low           | Risk of bias and imprecision   | 0.28    |
| King Vision<br>(1 RCT; 78 participants)                                                                                                                                                                                                                                  | 3.63 (-4.62 to 11.9)        | ⊕⊕⊕⊕<br>Low           | Risk of bias and imprecision   | 0.44    |
| Macintosh<br>(24 RCT; 1052 participants)                                                                                                                                                                                                                                 | No estimable                | Reference comparator  | No estimable                   | 0.68    |
| McGrath<br>(3 RCT; 287 participants)                                                                                                                                                                                                                                     | 2.23 (-3.44 to 7.90)        | ⊕⊕⊕⊕<br>Low           | Risk of bias and imprecision   | 0.52    |
| Miller<br>(6 RCT; 577 participants)                                                                                                                                                                                                                                      | 0.56 (-4.51-5.63)           | ⊕⊕⊕⊕<br>Low           | Risk of bias and imprecision   | 0.63    |
| Storz DCI<br>(1 RCT; 60 participants)                                                                                                                                                                                                                                    | 9.98 (1.72 to 18.3)         | ⊕⊕⊕⊕<br>Low           | Risk of bias and heterogeneity | 0.18    |
| Truview EVO2<br>(3 RCT; 170 participants)                                                                                                                                                                                                                                | 1.39 (-5.89 to 8.67)        | ⊕⊕⊕⊕<br>Low           | Risk of bias and imprecision   | 0.57    |
| Truview PCD<br>(4 RCT; 380 participants)                                                                                                                                                                                                                                 | 11.5 (3.01 to 19.9)         | ⊕⊕⊕⊕<br>Low           | Risk of bias and heterogeneity | 0.15    |
| RCT: Randomized controlled trial, CI:Confidence interval                                                                                                                                                                                                                 |                             |                       |                                |         |



**Figure S12.** Summary of findings table for the secondary outcome (intubation time).

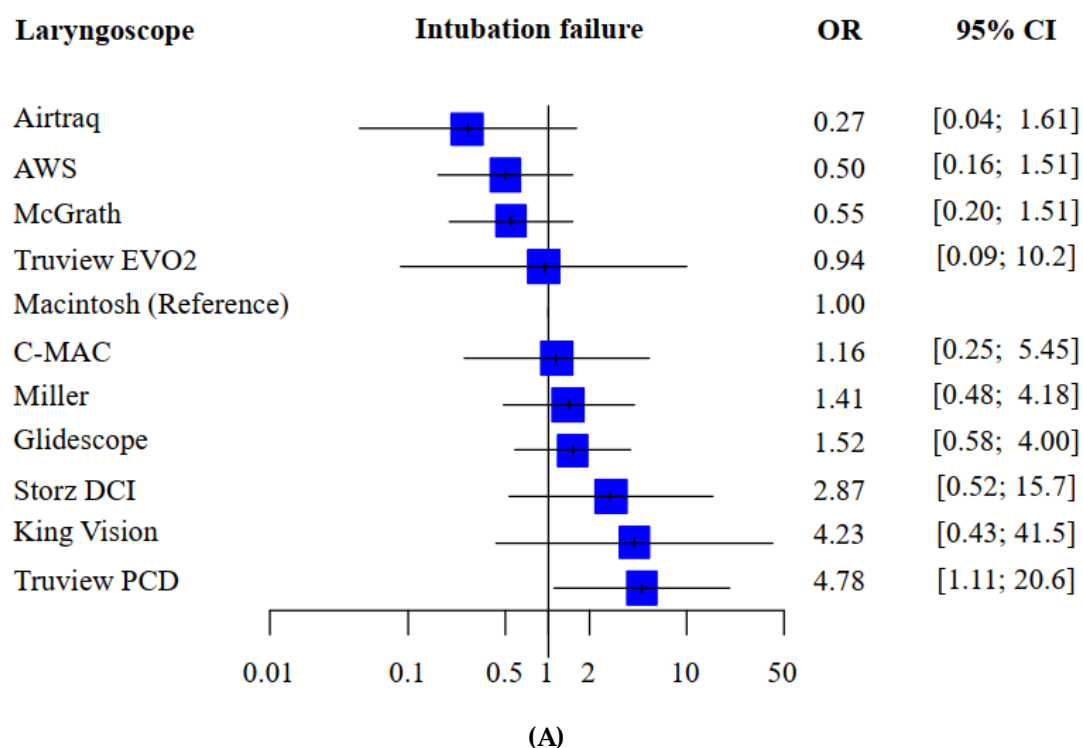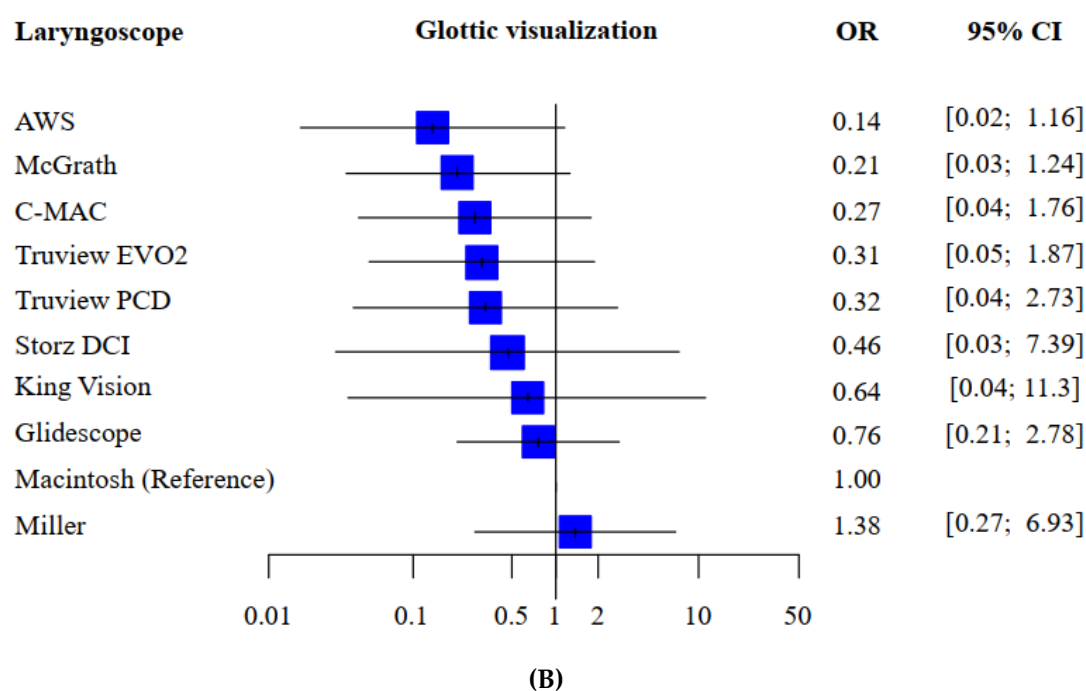

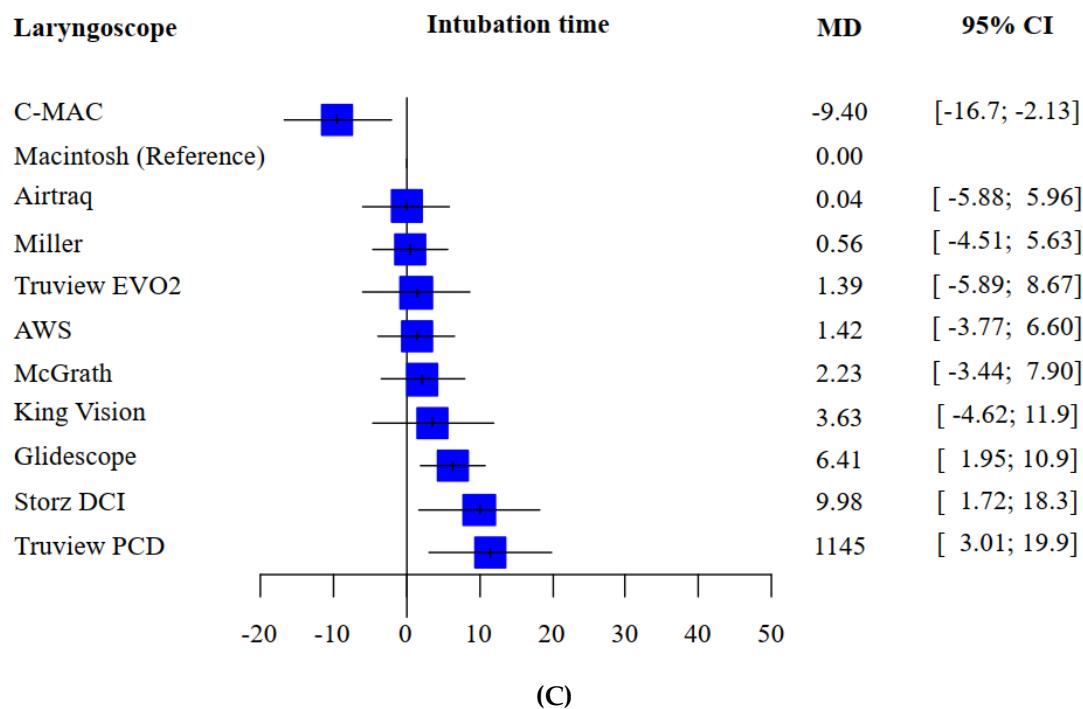

**Figure S13.** Forest plot of the subgroup analysis. (A:Forest plot of the intubation failure of tracheal intubation using the indirect laryngoscope compared with the Macintosh laryngoscope. B:Forest plot of glottic visualization with the indirect laryngoscope compared with the Macintosh laryngo-scope, Cormack–Lehane grade 1 and 2 vs. other grades. C:Forest plot of intubation time for tra-cheal intubation using the indirect laryngoscope compared with the Macintosh laryngoscope).

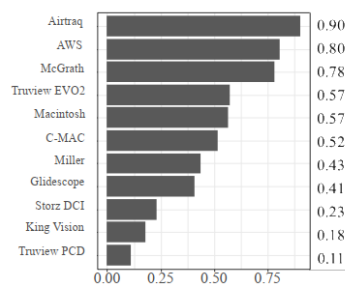

(A)

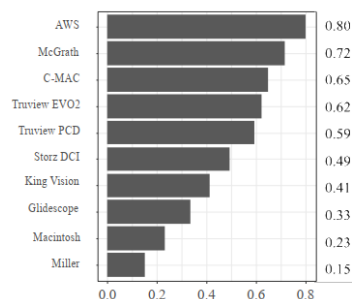

(B)

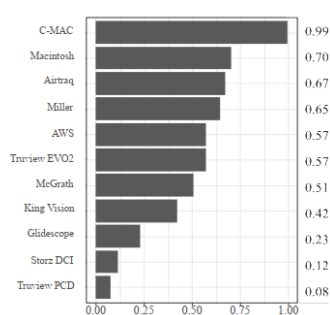

(C)

**Figure S14.** The results of subgroup analysis (A intubation failure, B glottic visualization, and C intubation time) by P score ranking.

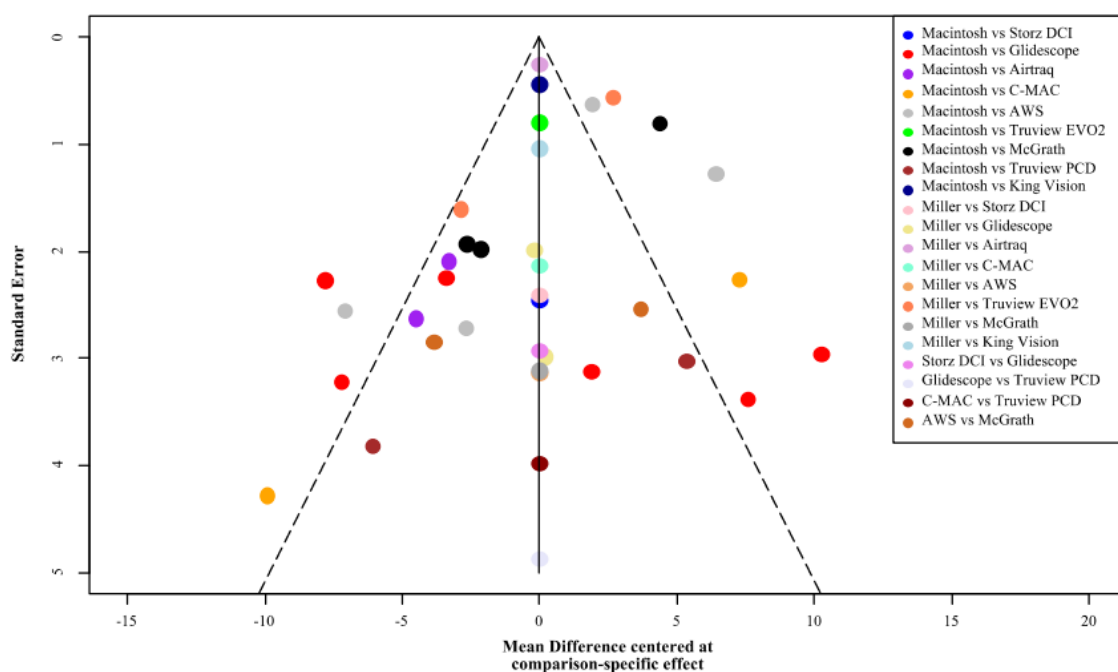

(A)

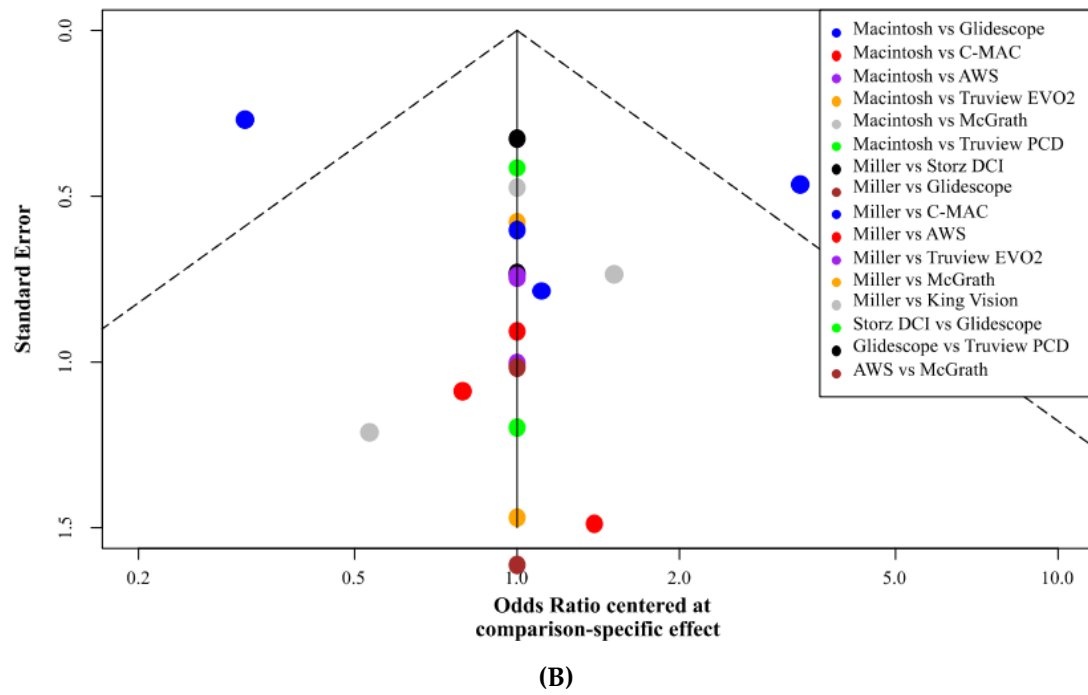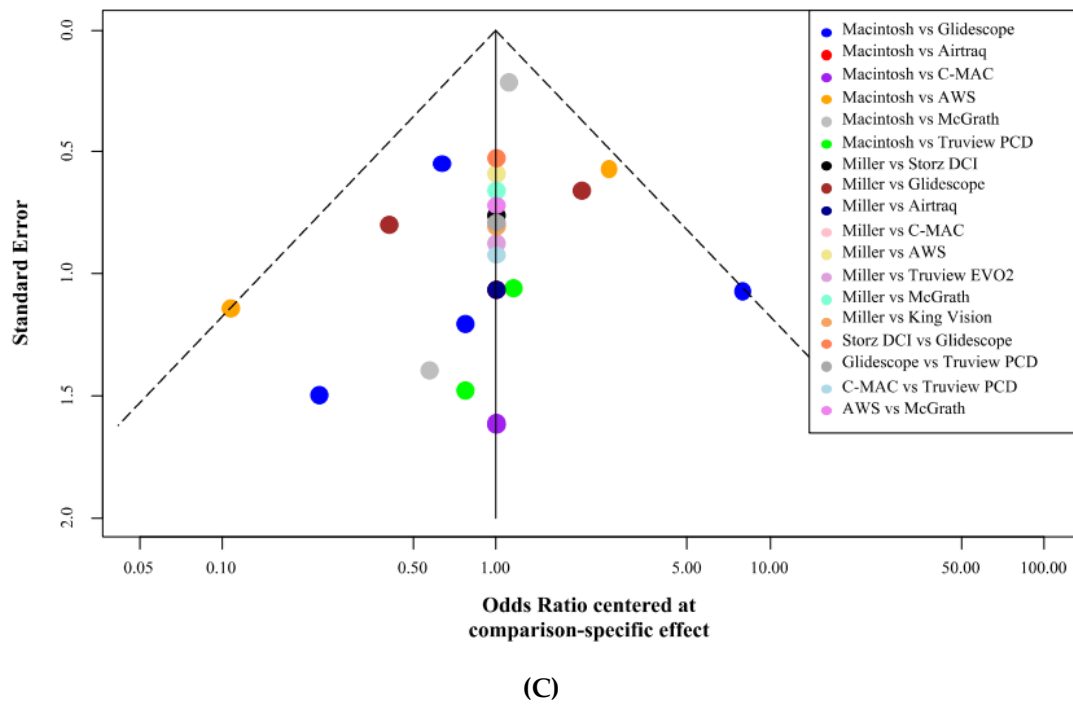

**Figure S15.** The results of funnel plot of the subgroup analysis (A: intubation failure, B: glottic visu-alization, and C: intubation time).
